# Supplementary material for: Hormonal steroids induce multidrug resistance and stress response genes in Neisseria gonorrhoeae by binding to MtrR
Source: PubMed Central journal article supplement (PMC10850145; doi:10.1038/s41467-024-45195-1), 2024-02-07
Supplement: 41467_2024_45195_MOESM1_ESM.pdf [file 41467_2024_45195_MOESM1_ESM.pdf]

## Supplementary tables

**Table S1. Steroidal hormones are substrates of the MtrCDE efflux pump**

|                                 | MIC ( $\mu\text{g/mL}$ ) |                            |                          |
|---------------------------------|--------------------------|----------------------------|--------------------------|
|                                 | Progesterone             | $\beta$ -estradiol         | Testosterone             |
| FA19                            | 40 (127 $\mu\text{M}$ )  | >320 (1175 $\mu\text{M}$ ) | 160 (555 $\mu\text{M}$ ) |
| FA19 <i>mtrD::kan</i><br>(KH14) | 20 (64 $\mu\text{M}$ )   | 320 (1175 $\mu\text{M}$ )  | 40 (139 $\mu\text{M}$ )  |

\*Minimal inhibition concentration is defined by the lowest concentration at which visible growth is prevented.

**Table S2. Strains and plasmids**

| <b>Strains</b>            | <b>Description</b>                                                                                                                                  | <b>Reference</b> |
|---------------------------|-----------------------------------------------------------------------------------------------------------------------------------------------------|------------------|
| FA19                      | Cervical isolate from a woman with disseminated gonococcal infection. Possesses a WT <i>mtr</i> locus                                               | <sup>1</sup>     |
| JF1                       | FA19 $\Delta mtrR$                                                                                                                                  | <sup>2</sup>     |
| FA19::P <i>lptA-lacZ</i>  | FA19 carrying pLES94- <i>lptA</i>                                                                                                                   | <sup>3</sup>     |
| JC106                     | FA19 carrying pLES94- <i>mtrC</i>                                                                                                                   | This study       |
| JC107                     | JF1 carrying pLES94- <i>mtrC</i>                                                                                                                    | This study       |
| JC108                     | FA19 carrying pLES94- <i>rpoH</i>                                                                                                                   | This study       |
| JC109                     | JF1 carrying pLES94- <i>rpoH</i>                                                                                                                    | This study       |
| JC110                     | FA19 carrying pLES94- <i>ngo1249</i>                                                                                                                | This study       |
| JC89                      | JF1 carrying pLES94- <i>mtrC</i> and pGCC3- <i>mtrR</i>                                                                                             | This study       |
| JC90                      | JF1 carrying pLES94- <i>mtrC</i> and pGCC3- <i>mtrR</i> -W136L                                                                                      | This study       |
| JC91                      | JF1 carrying pLES94- <i>rpoH</i> and pGCC3- <i>mtrR</i>                                                                                             | This study       |
| JC92                      | JF1 carrying pLES94- <i>rpoH</i> and pGCC3- <i>mtrR</i> -W136L                                                                                      | This study       |
| JC93                      | JF1 carrying pLES94- <i>mtrC</i> and pGCC3- <i>mtrR</i> -R176E                                                                                      | This study       |
| JC94                      | JF1 carrying pLES94- <i>rpoH</i> and pGCC3- <i>mtrR</i> -R176E                                                                                      | This study       |
| JC101                     | JF1 carrying pLES94- <i>mtrC</i> and pGCC3- <i>mtrR</i> -D171A                                                                                      | This study       |
| JC102                     | JF1 carrying pLES94- <i>rpoH</i> and pGCC3- <i>mtrR</i> -D171A                                                                                      | This study       |
| <b>Plasmid</b>            | <b>Description</b>                                                                                                                                  | <b>Reference</b> |
| pLES94                    | Vector carrying a promoterless <i>lacZ</i> and <i>proAB</i> homology regions for recombination in <i>N. gonorrhoeae</i>                             | <sup>4</sup>     |
| pLES94- <i>mtrC</i>       | pLES94 with a <i>mtrC-lacZ</i> transcriptional and translational fusion                                                                             | This study       |
| pLES94- <i>rpoH</i>       | pLES94 with a <i>rpoH-lacZ</i> transcriptional and translational fusion                                                                             | This study       |
| pLES94- <i>lptA</i>       | pLES94 with a <i>lptA-lacZ</i> transcriptional and translational fusion                                                                             | <sup>3</sup>     |
| pLES94- <i>ngo1249</i>    | pLES94 with a <i>ngo1249-lacZ</i> transcriptional and translational fusion                                                                          | This study       |
| pGCC3                     | Vector for genetic complementation in gonococci. Carries the <i>lctP-aspC</i> loci for homologous recombination. Erm <sup>R</sup> , Km <sup>R</sup> | <sup>5</sup>     |
| pGCC3- <i>mtrR</i>        | pGCC3 containing a copy of the <i>mtrR</i> locus encoding MtrR from its own promoter                                                                | This study       |
| pGCC3- <i>mtrR</i> -W136L | pGCC3 containing a copy of the <i>mtrR</i> locus encoding mutant MtrR (W136L) from its own promoter                                                 | This study       |
| pGCC3- <i>mtrR</i> -R176E | pGCC3 containing a copy of the <i>mtrR</i> locus encoding mutant MtrR (R176E) from its own promoter                                                 | This study       |
| pGCC3- <i>mtrR</i> -D171A | pGCC3 containing a copy of the <i>mtrR</i> locus encoding mutant MtrR (D171A) from its own promoter                                                 | This study       |
| <i>mtrR</i> -pMCSG7       | pMCSG7 bearing the WT <i>mtrR</i> CDS                                                                                                               | <sup>6</sup>     |
| pGAB020RGB                | Point mutation derivative of <i>mtrR</i> -pMCSG7 obtained with DpnI-mediated site-directed mutagenesis encoding <i>mtrR</i> W136L                   | <sup>6</sup>     |
| pGAB018RGB                | Point mutation derivative of <i>mtrR</i> -pMCSG7 obtained with DpnI-mediated site-directed mutagenesis encoding <i>mtrR</i> R176E                   | <sup>6</sup>     |

|            |                                                                                                                                   |            |
|------------|-----------------------------------------------------------------------------------------------------------------------------------|------------|
| pGMH012RGB | Point mutation derivative of <i>mtrR</i> -pMCSG7 obtained with DpnI-mediated site-directed mutagenesis encoding <i>mtrR</i> D171A | This study |
| pGMH013RGB | Point mutation derivative of <i>mtrR</i> -pMCSG7 obtained with DpnI-mediated site-directed mutagenesis encoding <i>mtrR</i> W136A | This Study |
| pGMH014RGB | Point mutation derivative of <i>mtrR</i> -pMCSG7 obtained with DpnI-mediated site-directed mutagenesis encoding <i>mtrR</i> Q133A | This Study |

---

**Table S3 Oligonucleotides used in this study**

| <b>Oligonucleotide</b> | <b>Sequence (5'-3')</b>             |
|------------------------|-------------------------------------|
| mtrC-lacZ-F            | TTTGGATCCGGTTTGACGAGGGC             |
| mtrC-lacZ-R            | AGGGATCCGAAGCATAAAAAGCCATTATTT      |
| rpoH-lacZ-F            | GGGATCCGGCGAAACGCCCTATATGAA         |
| rpoH-lacZ-R            | GGGATCCCGATTCAATTTGGGGCATTTCCTTT    |
| 1249-lacZ-F            | CCGGATCCAAATCTTTTTGAACCATA          |
| 1249-lacZ-R            | ATGGATCCTTAAACATTTTCTTTTCCTTTC      |
| proABFw                | AACTCGATGGAAGTGCTGCTGGT             |
| lacZRv                 | AACTGTTGGGAAGGGCGATCGGT             |
| pacImtrR-Fw            | GGTTAATTAACGCCCTTAGAAGCATAAAAAGCCAT |
| pmelmtrR-Rv            | GGGTTTAAACTTATTTCCGGCGCAGGCAG       |
| pGCC3Rv                | AACCCTTAATATAACTTCGTATAATG          |
| mtrR_qRT_R             | GTGGATGTCGTTGCTTTGCA                |
| lctPqFw                | CGCCATCAAACTTTTCTACTTCGG            |
| mtrR-midRv             | AAGCATCAGGTGTTCTTTGGTTTT            |
| mtrR-midFw             | ATGAGAAAAACCAAACCGAAGCC             |

## Supplementary figures and legends

Figure S1:

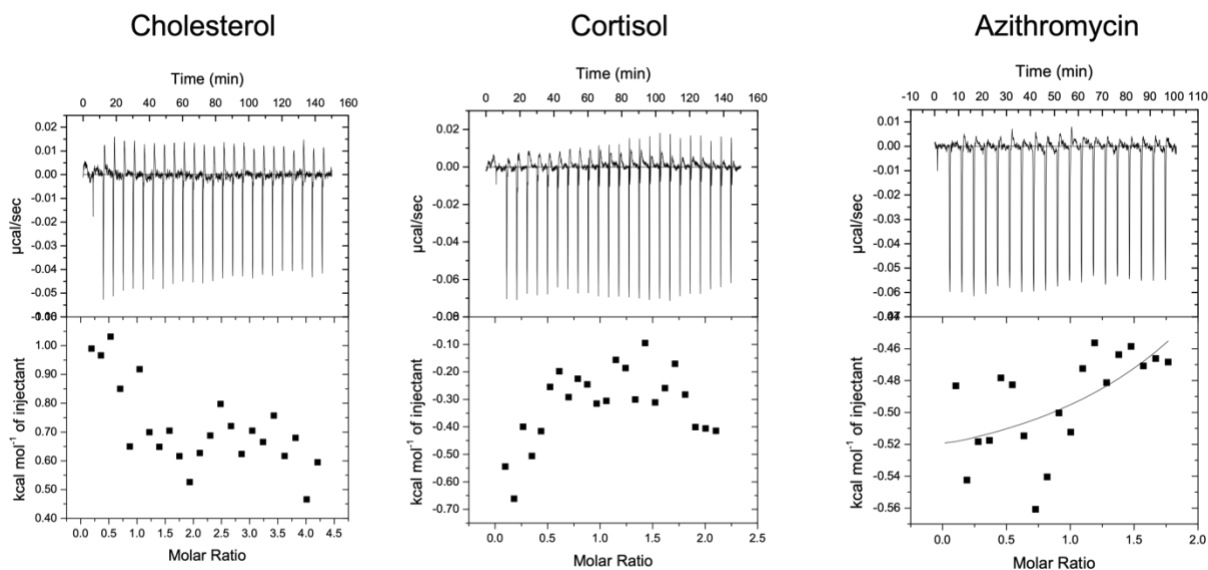

**Figure S1: Characterization of the MtrR ligand binding pocket:**

Isothermal titration calorimetry thermograms and resulting binding isotherms for binding reactions between MtrR WT with cholesterol, cortisol, and azithromycin. Purified MtrR was concentrated to 20 µM in purification buffer plus 0.6 - 1% MeOH. Titrations with 20 µM MtrR in the sample cell and 100 µM (cholesterol), 200 µM (cortisol), or 250 µM (azithromycin) in the syringe were performed using a VP-ITC microcalorimeter (Microcal Inc.). ITC experiments were conducted at 25 °C with a stirring speed of 199 rpm. Data were analyzed using ORIGIN 7.0. At least three experimental measurements, technical and some biological replicates, were averaged for each reported binding constant.

Figure S2.

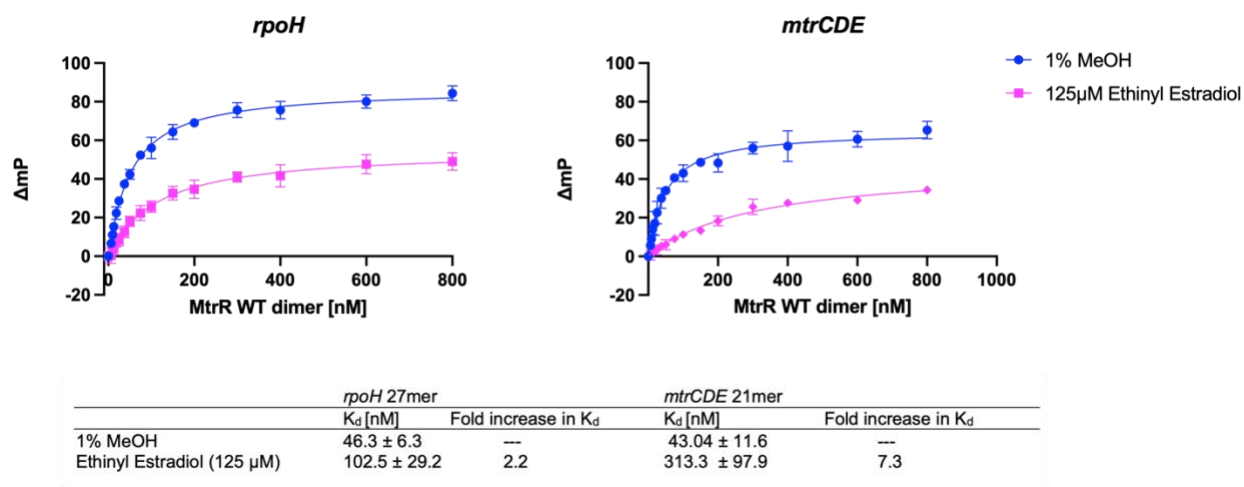

**Figure S2: Presence of Ethinyl Estradiol influences binding of MtrR to *rpoH* and *mtrCDE* operators.** Plate based Fluorescence polarization DNA-binding isotherms reveal decreases in the binding affinity of MtrR for the *rpoH* and *mtrCDE* operators in the presence of ethinyl estradiol. Experiments were run on the three independent experimental measurements were averaged for each reported binding constant. Data are represented by the mean values (point) +/- SEM (error bar).

Figure S3

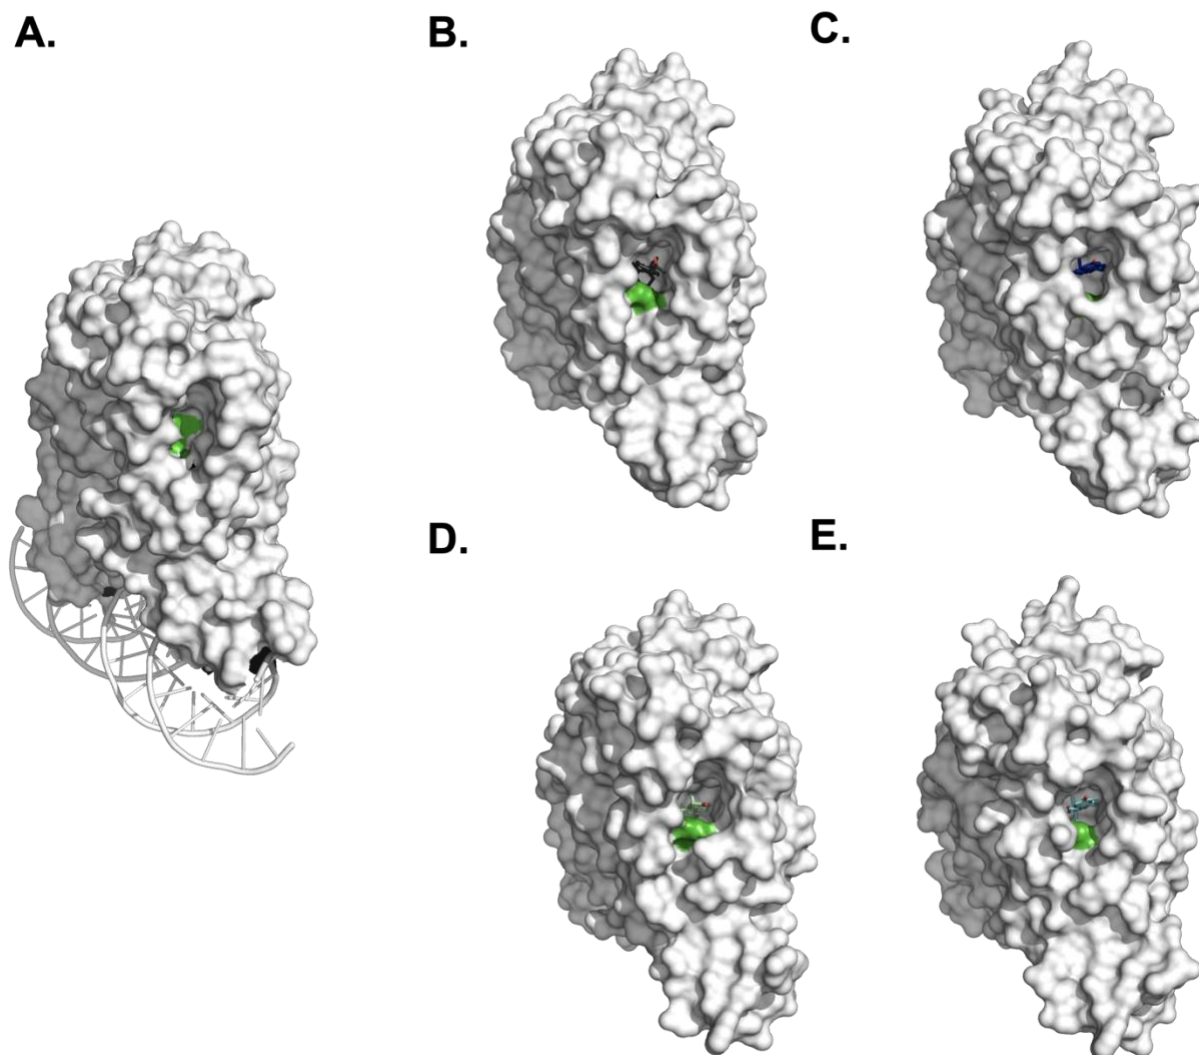

**Figure S3: Entrance to ligand binding pocket.** Surface view of MtrR bound to (A) the *mtrCDE* operator (PDB: 7JU3)<sup>7</sup>, (B) progesterone colored charcoal, (C)  $\beta$ -estradiol blue, (D) testosterone pale green, and (E) ethinyl estrogen cyan. W136 painted in green.

Figure S4

A.

MtrR + Progesterone

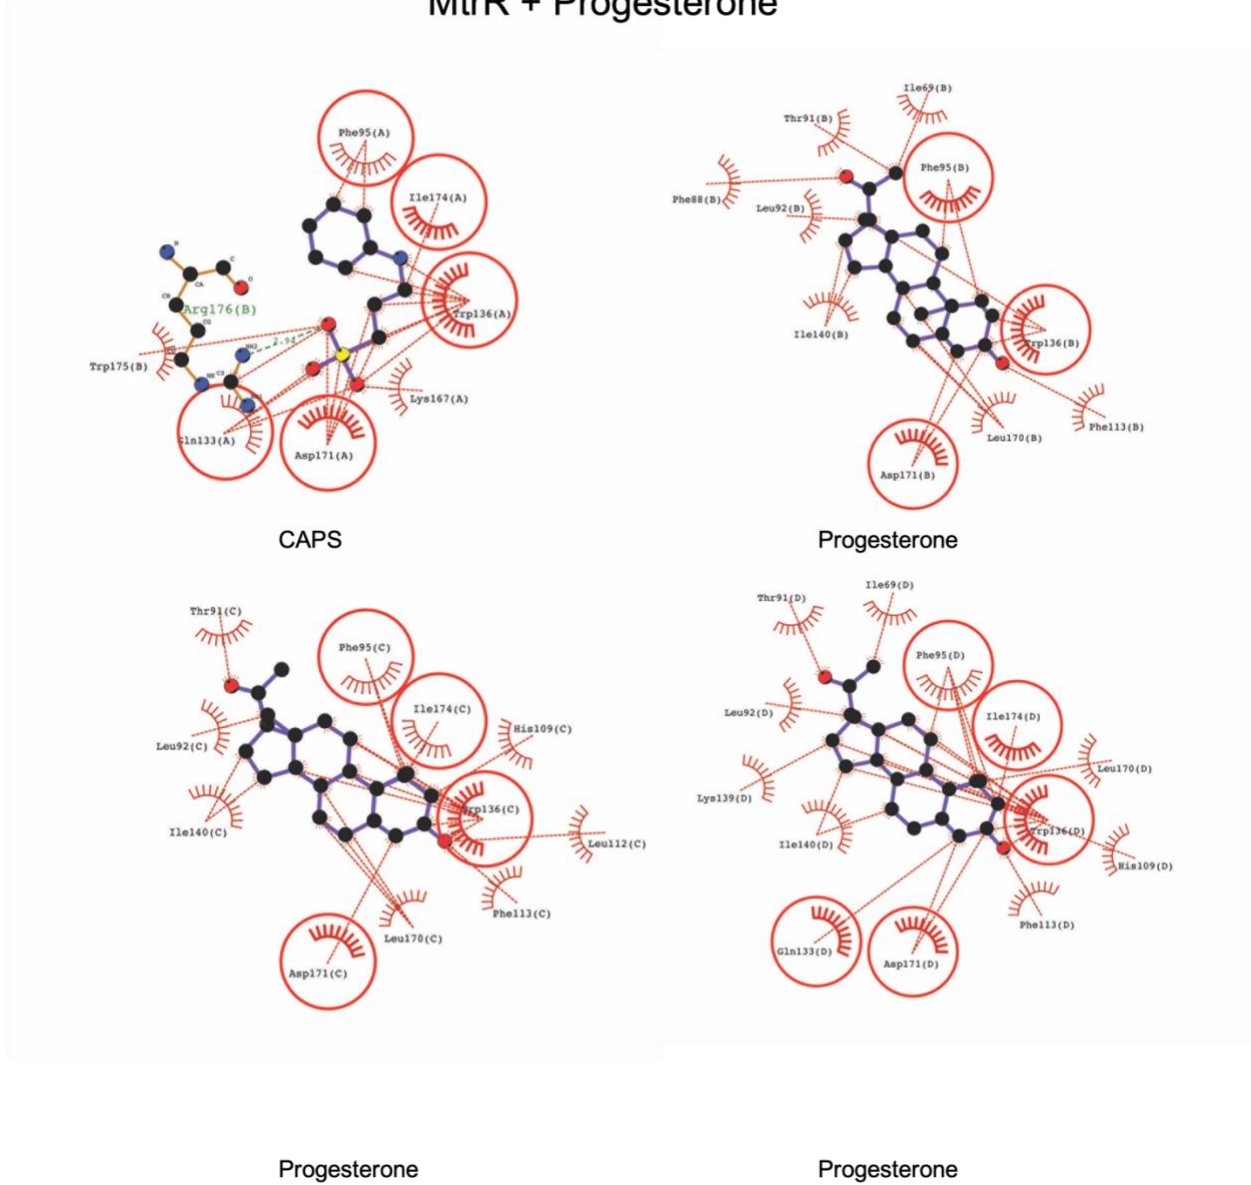





C.

### MtrR + $\beta$ -Estradiol

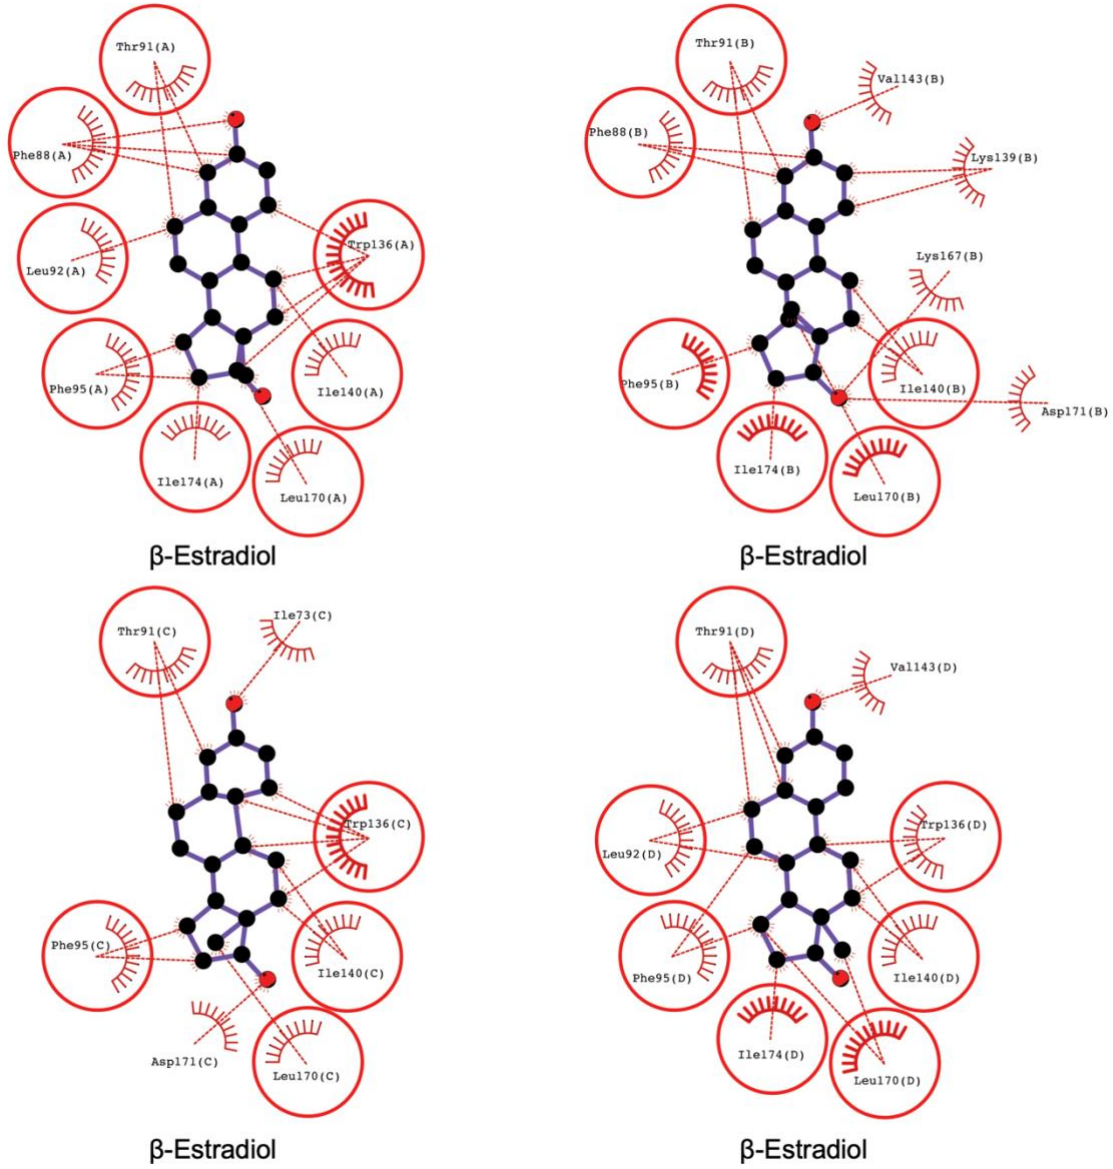

D.

### MtrR + Ethinyl Estradiol

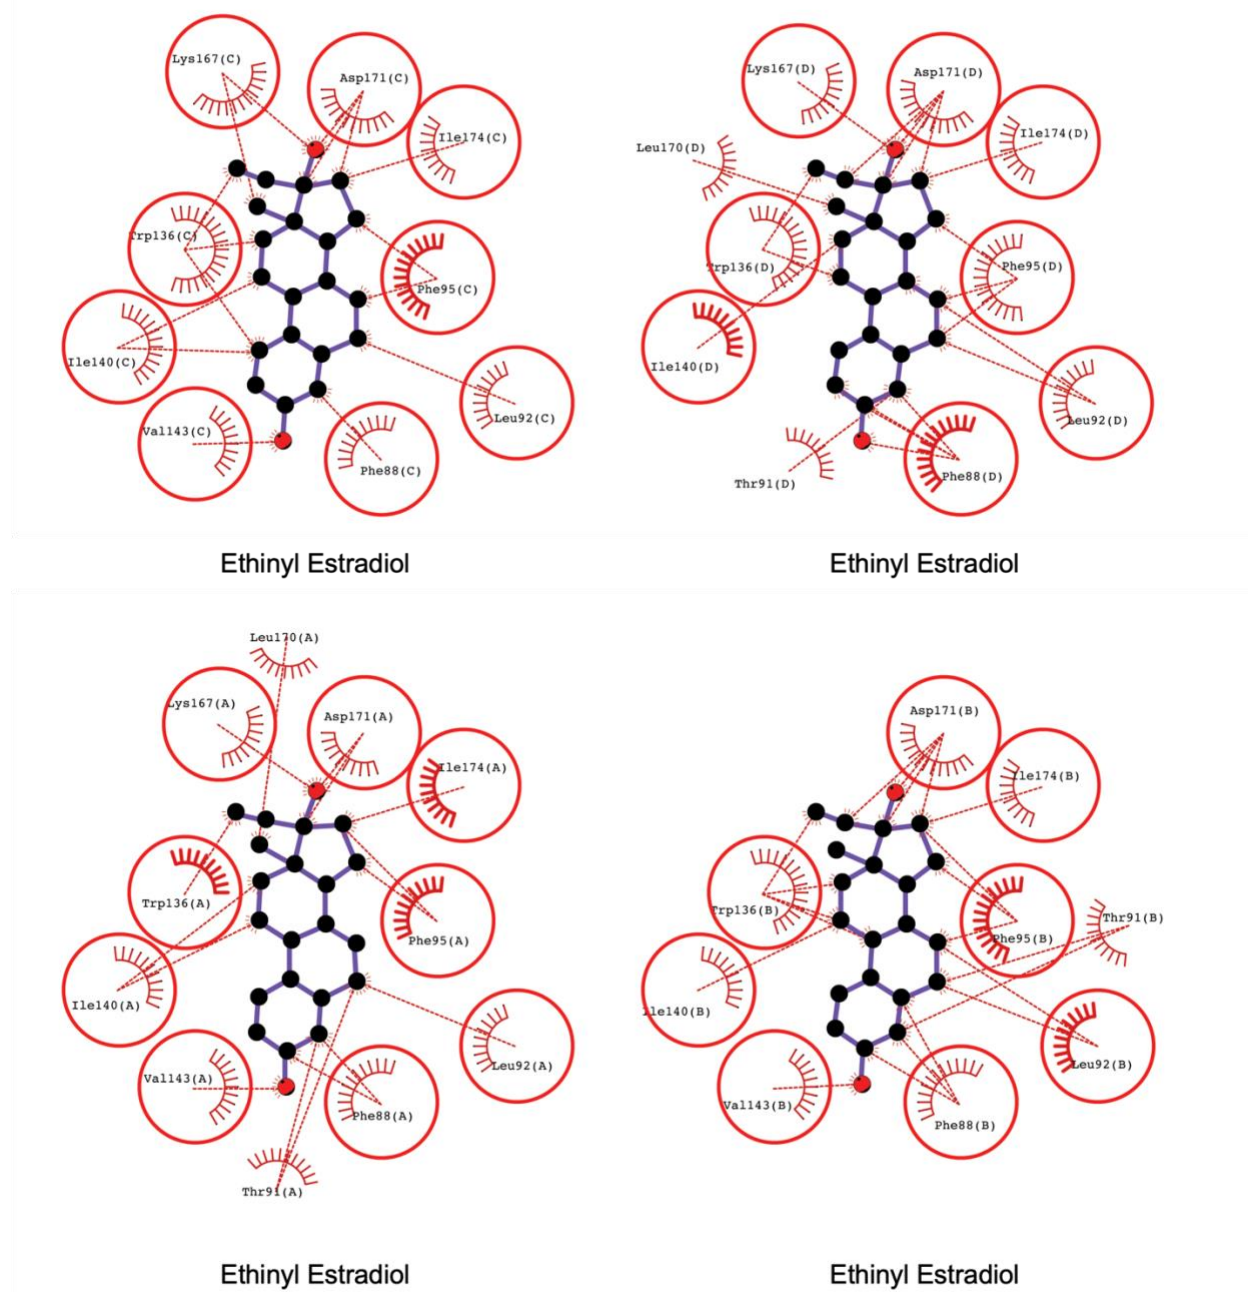

**Figure S4: Interaction of MtrR and steroids.**

LigPlot+ v.2.2 was used to highlight residues important for MtrR and ligand binding. A-D. Interactions between MtrR-PTR, MtrR-TES, MtrR-EST, and MtrR-NDR, respectively, in each binding pocket in the ASU (4 subunits per ASU). The chemical structure of each ligand is shown.

Potential hydrogen bonds are shown when the maximum hydrogen bond donor-acceptor distances are between 2.70 – 3.35 Å. Potential non-bonded contacts, i.e., Van der Waals/hydrophobic interactions, between 2.90 – 3.90 Å are also shown. MtrR residues involved in hydrophobic contacts are shown with red eyelashes with ticked lines to the corresponding atoms involved. Hydrogen bonds and their lengths in angstrom are shown in green. Residues with equivalent interactions in all ASU's are circled in red.

Figure S5

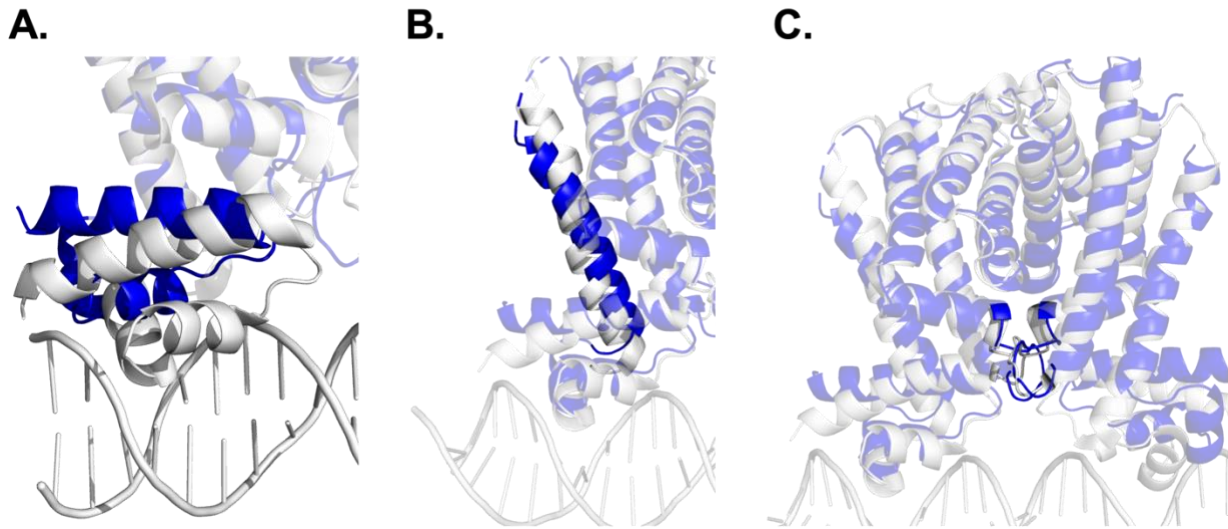

**Figure S5: Induction movements of MtrR.** Overlay of induced MtrR bound to  $\beta$ -estradiol (blue) and MtrR bound to the *mtrCDE* operator site (white). Key conformational changes occur in the HTH domain (A),  $\alpha 4$  (B), and the loop formed by residues 114-122, between helices  $\alpha 6$  and  $\alpha 7$  (C).

Figure S6

A

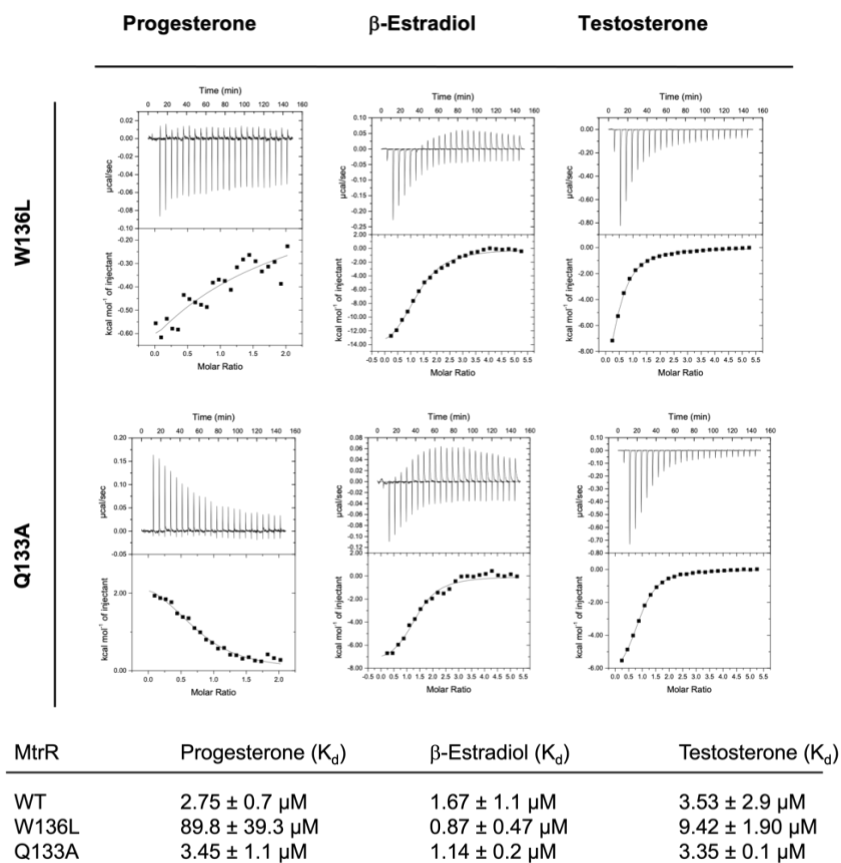

B

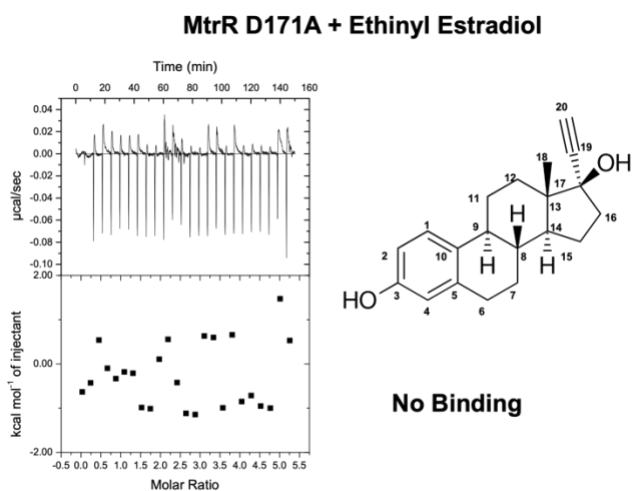

Figure S6: Characterization of the MtrR ligand binding pocket:

Isothermal titration calorimetry thermograms and resulting binding isotherms for binding reactions between (A) MtrR W136L and Q133A with progesterone,  $\beta$ -estradiol, or testosterone and (B) MtrR

D171A with ethinyl estradiol. Purified MtrR mutants were concentrated to 20  $\mu\text{M}$  in purification buffer plus 1% MeOH. Titrations with 20 or 5  $\mu\text{M}$  MtrR in the sample cell and 125, 200, or 500  $\mu\text{M}$  compound in the syringe were performed using a VP-ITC microcalorimeter (Microcal Inc.). ITC experiments were conducted at 25  $^{\circ}\text{C}$  with a stirring speed of 199 rpm. Data were analyzed using ORIGIN 7.0. At least three experimental measurements, technical and some biological replicates, were averaged for each reported binding constant.

**Figure S7**

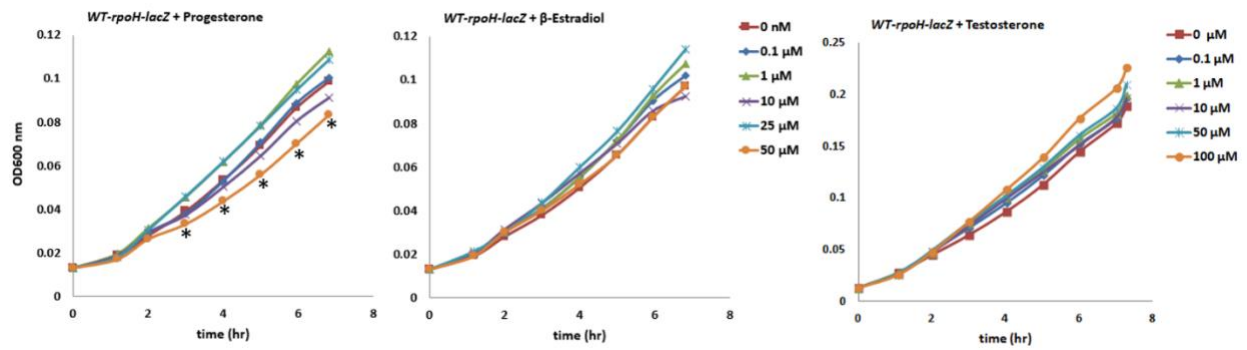

**Fig S7. Growth curve of strain JC108 in increasing concentrations of hormones.**  $10^8$  CFU/mL of gonococci were grown statically at 37 °C, 5% (v/v) CO<sub>2</sub> in 100 μL of GC-broth in 96-well polystyrene plates. \* Statistical differences between 1 and 50 μM hormone using a one-tailed t-test; in all cases the p value was < 0.05.



Figure S8

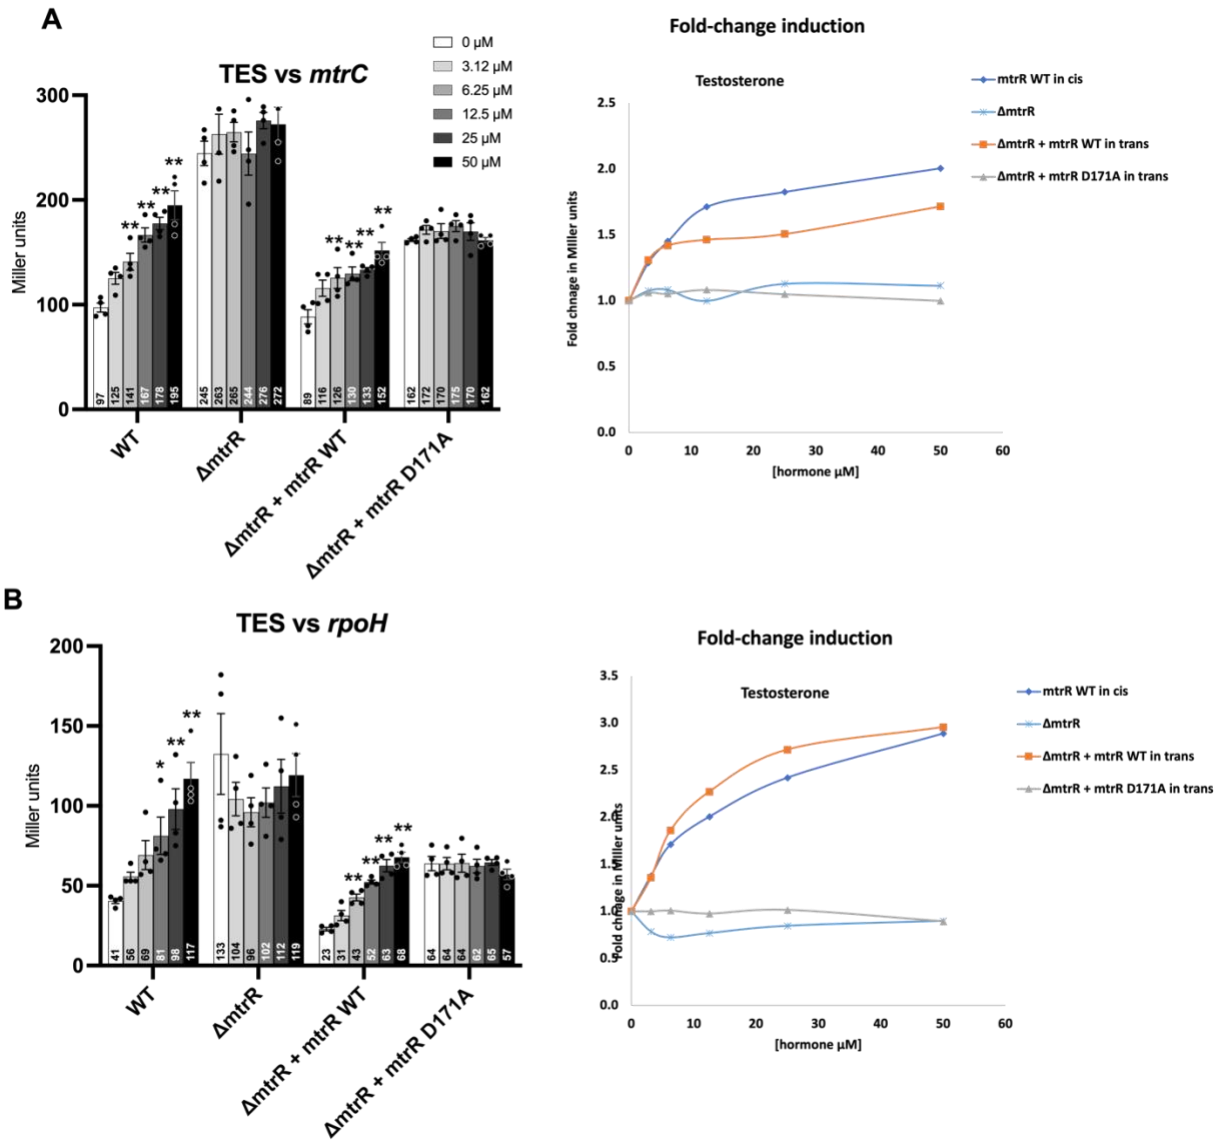

**Fig S8. Testosterone induces the expression of gonococcal genes *mtrC* and *rpoH* in an MtrR-dependent manner.**  $10^8$  CFU/mL of wild-type (WT) *mtrR* bearing strains (JC106 and JC108), *mtrR* deletion mutants (JC107 and JC109) and complemented strains in trans with WT *mtrR* (JC89 and JC91) and mutant allele *mtrR* D171A (JC101 and JC102) were grown in GC-broth to late exponential phase in increasing concentrations of testosterone, statically in 96-well plates (37  $^{\circ}$ C, 5% v/v  $\text{CO}_2$ ). Expression of *mtrC* (A) and *rpoH* (B) was measured from the transcriptional and translational *lacZ* fusions and expressed as a corresponding  $\beta$ -galactosidase activity in Miller units as described in Methods. Data are represented by the mean (bar) + SEM (error bar) of n=4 biological samples in the bar graphs and as fold change in Miller units relative

to the zero-hormone control in the line graphs. The experiments were performed at least thrice with reproducible results. Statistics: ANOVA test and a Dunnett's Multiple Comparison post-test (\*, \*\* statistically different from 0  $\mu$ M at  $p < 0.05$  and  $0.01$ )

Figure S9

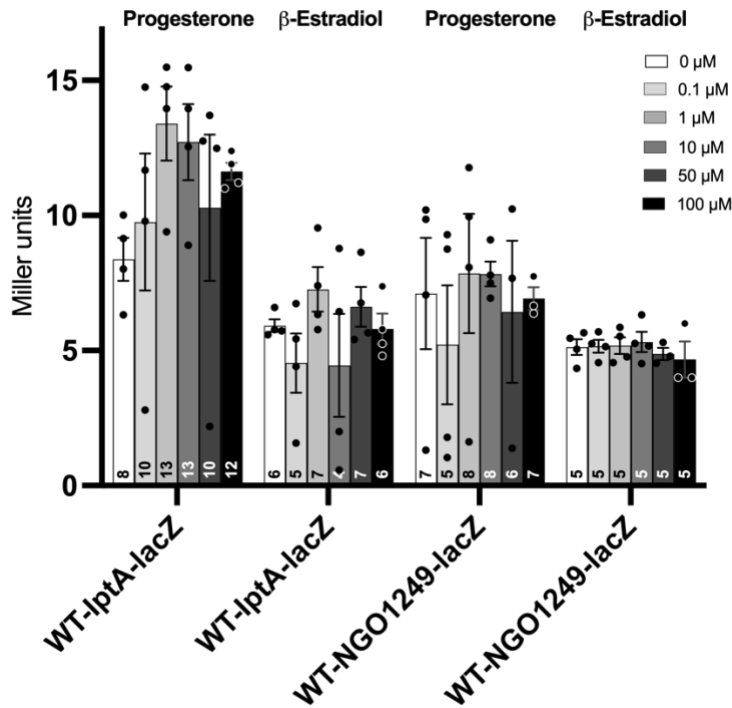

**Fig S9. Steroidal hormones do not affect the expression of *lptA* and *ngo1249*, genes outside the MtrR regulon.** Steroidal hormones did not affect the expression of two genes not regulated by MtrR, which validates that the differences we observed in expression levels for *mtrC* and *rpoH* in the presence of the hormones are due to MtrR regulation and not to a polar effect of the hormones at the locus where these recombinant genetic constructions were placed.  $10^8$  CFU/mL of gonococci were grown in GC-broth to late exponential phase in increasing concentrations of progesterone or  $\beta$ -estradiol, statically in 96-well plates (37 °C, 5% v/v CO<sub>2</sub>). Expression of *lptA* (in strain FA19::PlptA-lacZ) and *ngo1249* (in strain JC110) was measured using transcriptional and translational *lacZ* fusions and the corresponding  $\beta$ -galactosidase activities were expressed in Miller units. Data are represented by the mean (bar) + SEM (error bar) of n=4 biological samples. The experiments were performed at least twice with reproducible results. There were not statistical differences by addition of the hormones by performing an ANOVA test and a Dunnett's Multiple Comparison post-test.

Figure S10

A

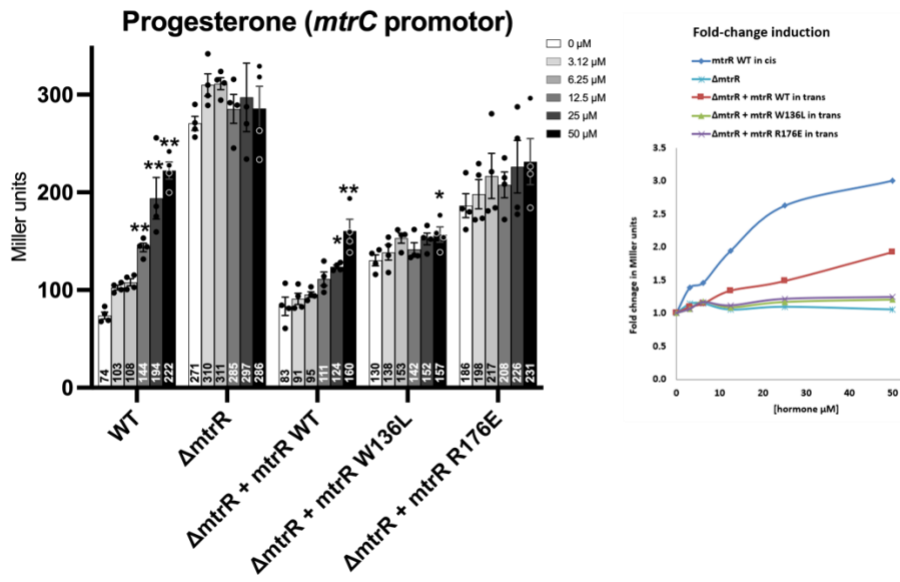

B

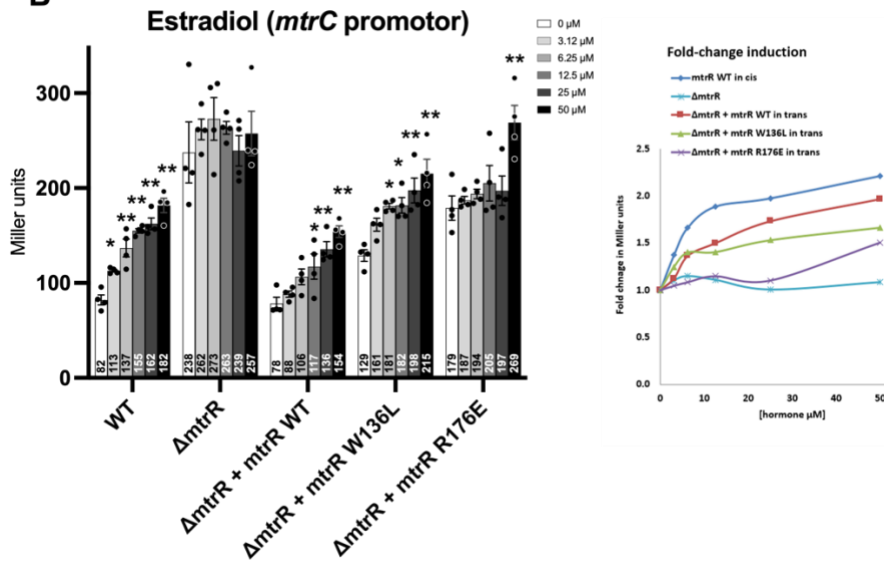

C

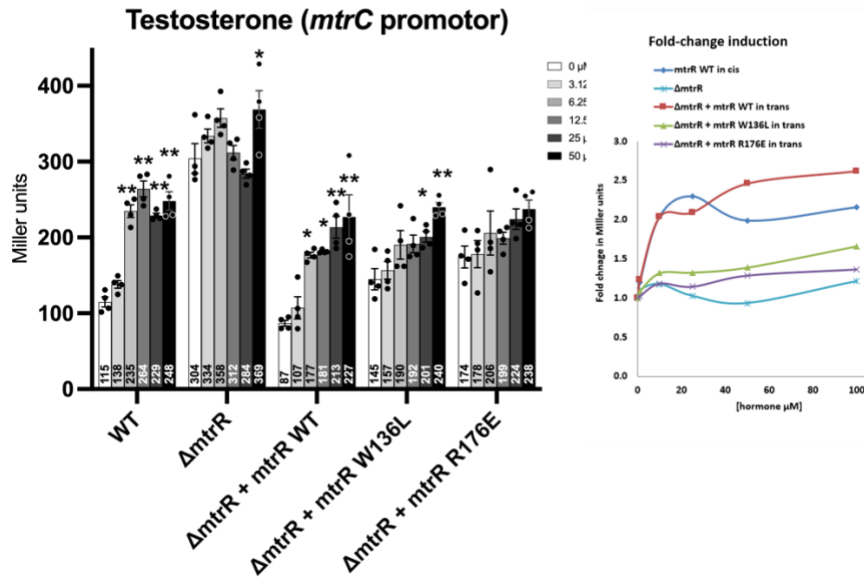

D

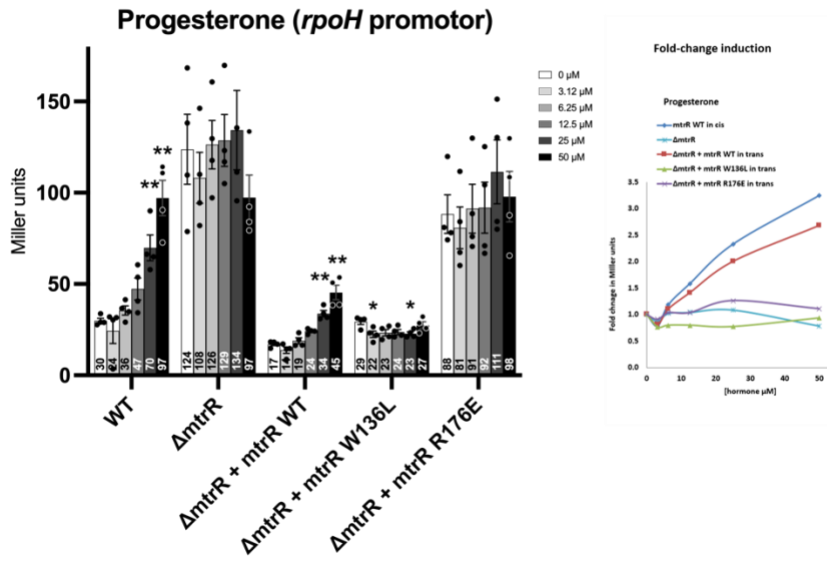

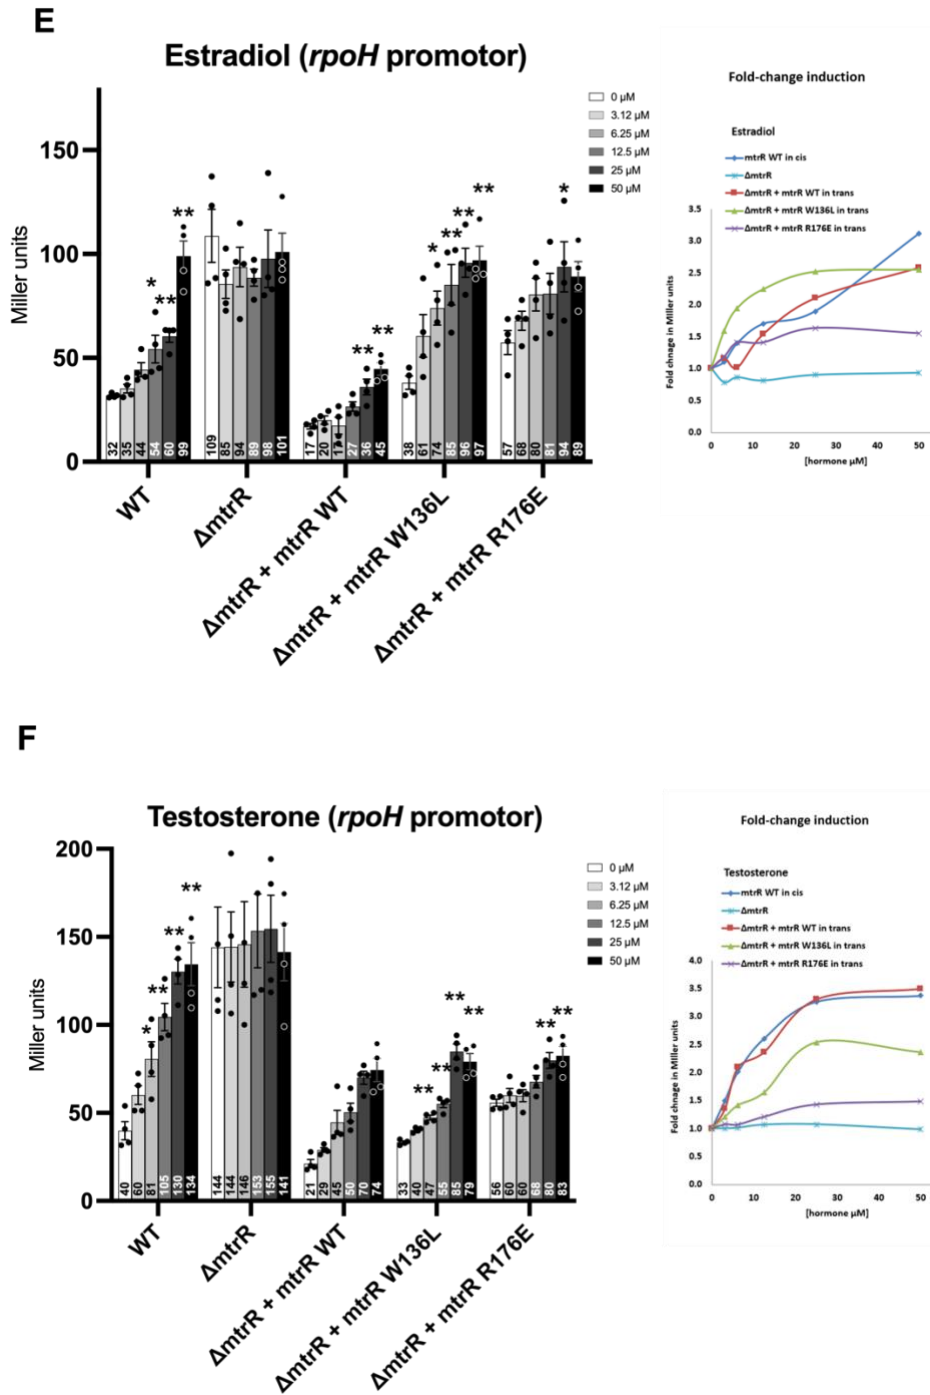

**Fig S10. Steroidal hormones induce the expression of gonococcal genes *mtrC* and *rpoH* in an MtrR-dependent manner.**  $10^8$  CFU/mL of wild-type (WT) *mtrR* bearing strains (JC106 and JC108), *mtrR* deletion mutants (JC107 and JC109) and complemented strains in trans with WT *mtrR* (JC89 and JC91) and mutant alleles *mtrR* W136L (JC90 and JC92) and *mtrR* R176E (JC93 and JC94) were grown in GC-broth to late exponential phase in increasing concentrations of progesterone (A and D), estradiol (B and E) and testosterone (C and F), statically in 96-well plates

(37 °C, 5% v/v CO<sub>2</sub>). Expression of *mtrC* (A-C) and *rpoH* (D-F) was measured from the transcriptional and translational *lacZ* fusions and expressed as a corresponding β-galactosidase activity in Miller units as described in Methods. Data are represented by the mean (bar) + SEM (error bar) of n=4 biological samples in the bar graphs and as fold change in Miller units relative to the zero-hormone control in the line graphs. The experiments were performed at least thrice with reproducible results. Statistics: ANOVA test and a Dunnett's Multiple Comparison post-test (\*, \*\* statistically different from 0 μM at p<0.05 and 0.01).

Figure S11

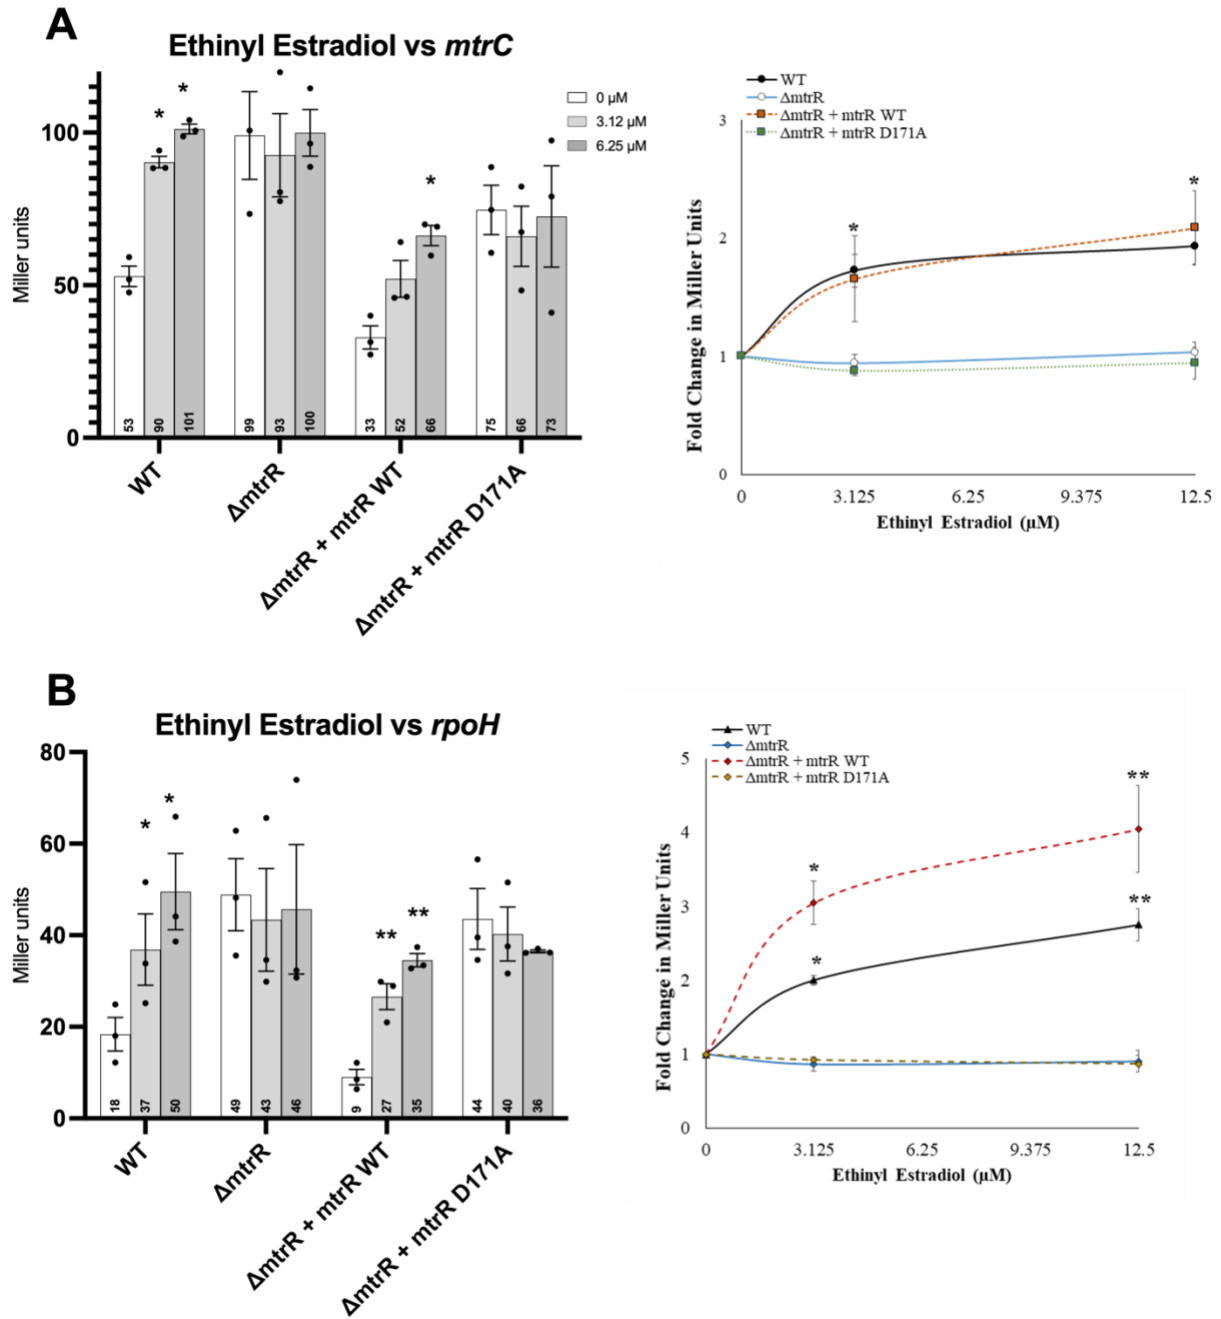

**Fig S11. Ethinyl Estradiol induces the expression of gonococcal genes *mtrC* and *rpoH* in an MtrR-dependent manner.**  $10^8$  CFU/mL of wild-type (WT) *mtrR* bearing strains (JC106 and JC108), *mtrR* deletion mutants (JC107 and JC109) and complemented strains in trans with WT *mtrR* (JC89 and JC91) and mutant allele *mtrR* D171A (JC101 and JC102) were grown in GC-broth to late exponential phase in increasing concentrations of ethinyl estradiol, statically in 96-well plates (37° C, 5% v/v CO<sub>2</sub>). Expression of *mtrC* (A) and *rpoH* (B) was measured from the transcriptional and translational *lacZ* fusions and expressed as a corresponding  $\beta$ -galactosidase



activity in Miller units as described in Methods. Data are represented by the mean (bar) + SEM (error bar) of n=3 biological samples in the bar graphs and as fold change in Miller units relative to the zero-hormone control in the line graphs. The experiments were performed at least thrice with reproducible results. Statistics: ANOVA test and a Dunnett's Multiple Comparison post-test (\*, \*\* statistically different from 0  $\mu$ M at  $p < 0.05$  and  $0.01$ )

## Supplementary References

- 1 Sparling, P. F., Sarubbi, F. A., Jr. & Blackman, E. Inheritance of low-level resistance to penicillin, tetracycline, and chloramphenicol in *Neisseria gonorrhoeae*. *J Bacteriol* **124**, 740-749 (1975). <https://doi.org/10.1128/jb.124.2.740-749.1975>
- 2 Folster, J. P. & Shafer, W. M. Regulation of *mtrF* expression in *Neisseria gonorrhoeae* and its role in high-level antimicrobial resistance. *J Bacteriol* **187**, 3713-3720 (2005). <https://doi.org/10.1128/jb.187.11.3713-3720.2005>
- 3 Kandler, J. L. *et al.* The MisR Response Regulator Is Necessary for Intrinsic Cationic Antimicrobial Peptide and Aminoglycoside Resistance in *Neisseria gonorrhoeae*. *Antimicrob Agents Chemother* **60**, 4690-4700 (2016). <https://doi.org/10.1128/aac.00823-16>
- 4 Silver, L. E. & Clark, V. L. Construction of a translational *lacZ* fusion system to study gene regulation in *Neisseria gonorrhoeae*. *Gene* **166**, 101-104 (1995). [https://doi.org/10.1016/0378-1119\(95\)00605-6](https://doi.org/10.1016/0378-1119(95)00605-6)
- 5 Mehr, I. J. & Seifert, H. S. Random shuttle mutagenesis: gonococcal mutants deficient in pilin antigenic variation. *Mol Microbiol* **23**, 1121-1131 (1997). <https://doi.org/10.1046/j.1365-2958.1997.2971660.x>
- 6 Beggs, G. A. *et al.* Structural, Biochemical, and In Vivo Characterization of MtrR-Mediated Resistance to Innate Antimicrobials by the Human Pathogen *Neisseria gonorrhoeae*. *J Bacteriol* **201** (2019). <https://doi.org/10.1128/JB.00401-19>
- 7 Beggs, G. A. *et al.* Structures of *Neisseria gonorrhoeae* MtrR-operator complexes reveal molecular mechanisms of DNA recognition and antibiotic resistance-conferring clinical mutations. *Nucleic Acids Res* **49**, 4155-4170 (2021). <https://doi.org/10.1093/nar/gkab213>
