# Supplementary material for: Hormonal steroids induce multidrug resistance and stress response genes in Neisseria gonorrhoeae by binding to MtrR
Source: PubMed Central journal article supplement (PMC10850145; doi:10.1038/s41467-024-45195-1), 2024-02-07
Supplement: 41467_2024_45195_MOESM3_ESM.pdf [file 41467_2024_45195_MOESM3_ESM.pdf]

## Description of Additional Supplementary Files:

**Supplementary Movie 1:** Induction movement of MtrR. Morph video of induced MtrR bound to  $\beta$ -estradiol and MtrR bound to the mtrCDE operator site. Key conformational changes occur in the HTH domain,  $\alpha$ 4, and the loop formed by residues 114-122, between helices  $\alpha$ 6 and  $\alpha$ 7, (opaque blue).
